# Supplementary material
Source: PubMed Central journal article supplement (PMC6613802)

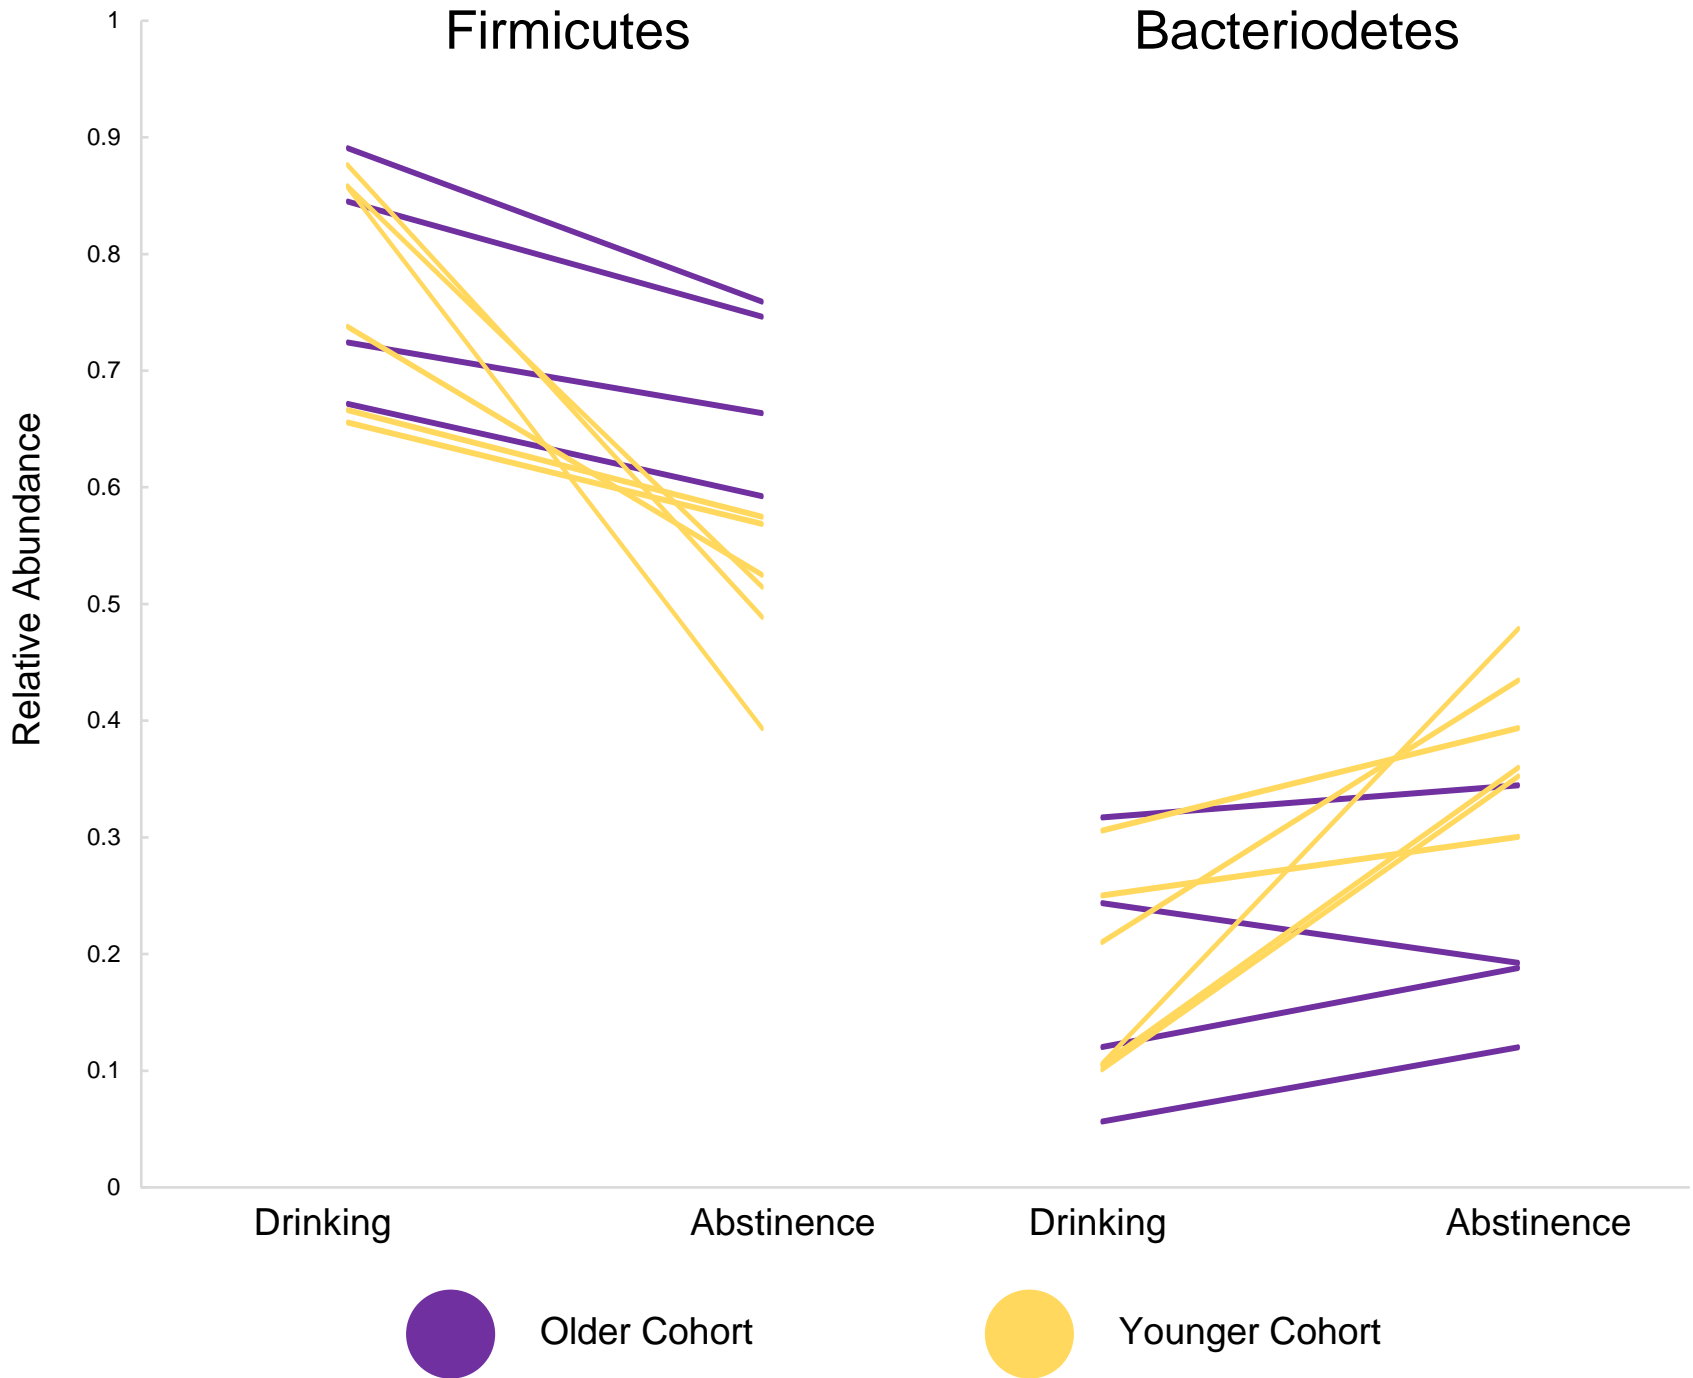

Supplement: NIHMS1525269-supplement-213_2019_5217_MOESM4_ESM.pdf [file NIHMS1525269-supplement-213_2019_5217_MOESM4_ESM.pdf]
